# Supplementary material for: Estimating Human Trabecular Meshwork Stiffness by Numerical Modeling and Advanced OCT Imaging
Source: PubMed Central journal article supplement — Invest Ophthalmol Vis Sci. 2017 Oct;58(11):4809–17. doi: 10.1167/iovs.17-22175 (PMC5624775; doi:10.1167/iovs.17-22175), 2017-10
Supplement: iovs-58-11-09_s02.pdf [file iovs-58-11-09_s02.pdf]

1 **Estimating human trabecular meshwork stiffness by numerical modeling and advanced**  
2 **OCT imaging**

3

4 Ke Wang<sup>1</sup>, Murray A. Johnstone<sup>2</sup>, Chen Xin<sup>3</sup>, Shaozhen Song<sup>3</sup>, Steven Padilla<sup>2</sup>, Janice A.  
5 Vranka<sup>4</sup>, Ted S. Acott<sup>4</sup>, Kai Zhou<sup>1</sup>, Stephen A. Schwaner<sup>1</sup>, Ruikang K. Wang<sup>3</sup>, Todd Sulchek<sup>5</sup>,  
6 C. Ross Ethier<sup>1,5\*</sup>

7 <sup>1</sup> Department of Biomedical Engineering, Georgia Institute of Technology/Emory University,  
8 Atlanta, GA

9 <sup>2</sup> Department of Ophthalmology, University of Washington, Seattle, WA

10 <sup>3</sup> Department of Bioengineering, University of Washington, Seattle, WA

11 <sup>4</sup> Department of Ophthalmology, Casey Eye Institute, Portland, Oregon

12 <sup>5</sup> George W. Woodruff School of Mechanical Engineering, Georgia Institute of Technology,  
13 Atlanta, GA

## 14 **1. Supplemental Material**

### 15 **Methods**

#### 16 **Mesh refinement study**

17 For 2D modelling approach, it is important to ensure that any finite element mesh is sufficiently  
18 refined so that the numerical simulations based on that mesh are not prone to significant  
19 numerical error, while also minimizing required computing time. To test this, we carried out a  
20 mesh refinement study on the finite element model created from quadrant 77R-IN. All  
21 parameters including boundary conditions, loading pressure, and tissue stiffness remained the  
22 same. TM stiffness was set at 114 kPa. Simulations were run for a series of different element  
23 sizes which were characterized by edge length.

#### 24 **3D model**

25 With the pseudo-2D modelling approach, the model geometry was created based only on tissue  
26 structures observed from a single 2D OCT slice. The tissue regions modeled in 2D at a single  
27 location were unable to adequately characterize the TLS oriented circumferentially in SC and  
28 therefore, it was impossible to depict those tissue structures which spanned several slices.  
29 Thus, a 3D model, including tissue structures such as TLS, collector channel and septae, was  
30 built and the estimated TM stiffnesses were compared between the 2D and 3D approaches.  
31 Specifically, a 3D model was built for the superior temporal quadrant of eye 80R to compare  
32 against the 2D approach. The geometry for the 3D model was based on 9 adjacent OCT  
33 images, instead of a single image as for the pseudo-2D models. The central OCT image used in  
34 the 3D model was the same as that in pseudo-2D model for eye 80R, giving a 3D model  
35 thickness of 80  $\mu\text{m}$  thus allowing us to include potentially relevant outflow tissue structures such  
36 as transluminal structures (TLS), septa and a collector channel (CC) (Figure S1). Cornea/Sclera

37 and CB were given the same stiffness values as those in pseudo-2D model. In the absence of  
38 any specific data, septae were assigned a stiffness which was close to that of TM. A pressure  
39 load was applied to all inner surfaces of the open SC and CC lumens, with a magnitude  
40 identical to that applied in the pseudo-2D model of the same quadrant. This did not precisely  
41 replicate the experimental situation, but allowed a direct comparison between results of the  
42 pseudo-2D model and the 3D model. As with the pseudo-2D models, the SC lumen  
43 configuration was compared between simulated and experimentally measured results.  
44 Specifically, the difference in SC area at the higher pressure (in this case 30 mmHg) of the 3D  
45 model was computed as

$$46 \quad \Delta Area = \sqrt{\sum_{n=1}^9 (Area_{OCT\_layer\_n} - Area_{FEM\_layer\_n})^2} \quad (S1)$$

47 where the index  $n$  refers to summation over the OCT cross-sections that the model was  
48 constructed from. This quantity was computed for different TM stiffnesses. The best match  
49 between computed and experimentally measured SC area was achieved at a TM stiffness of 48  
50 kPa, which can be compared to 60 kPa obtained from the pseudo-2D model.

51

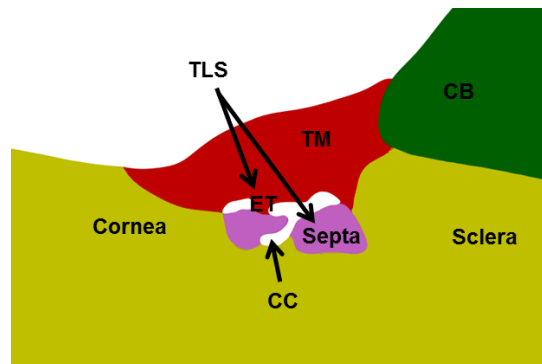

52

53 **Figure S1: One cross-section of the 3D model for superior quadrant of eye 80R. TM = trabecular meshwork, CB = ciliary body,**

54

**TLS = Trans Luminal Structure, ET = Endothelial lining, CC = collector channel.**

55

## 56 **Sensitivity analysis**

57 In practice, the biomechanical properties of outflow tissue other than the TM can vary from  
58 sample to sample. In addition, manual tissue boundary delineation may differ from reality and is  
59 somewhat subjective. We thus performed a sensitivity analysis on these aspects of the  
60 simulations in the 2D modelling approach.

61 First, the effects of sclera/cornea and ciliary body stiffnesses on predicted TM stiffness were  
62 evaluated using Latin Hypercube Sampling (LHS). LHS is an efficient stratified sampling  
63 technique where each input variable in a simulation is described by a probability distribution  
64 which is decomposed into equi-probable intervals [1]. For each simulation, a value for each  
65 variable is randomly selected from one equi-probable interval, without replacement. These input  
66 variables are used to drive a numerical simulation, and this process is repeated for many  
67 combinations of input variable values. An advantage of LHS is that it efficiently provides  
68 sensitivity information, which in this case was used to determine how changes in two variables  
69 (sclera/cornea stiffness and CB stiffness) impacted on estimated TM stiffness. The minimum  
70 number of required simulations,  $N$ , for a LHS study has been empirically established as  $N >$   
71  $4k/3$ , where  $k$  is the number of input variables [1, 2]. In this study, fifteen random combinations  
72 of sclera/cornea and CB stiffnesses were generated by LHS, which satisfied the above criterion.

73 A key step in the LHS process is specifying the probability distributions of the input variables.  
74 We took mean stiffnesses for sclera/cornea and CB to be 3000 kPa and 100 kPa, respectively,  
75 as in the preliminary simulations. The stiffness range for normal human sclera/cornea was taken  
76 as 1000 – 5000 kPa [3, 4]. CB stiffness varied from 30 – 170 kPa. The lower and upper bounds  
77 for the CB stiffness were assumed to be  $\text{mean} \pm 0.7 \cdot \text{mean}$ , to match the proportional range for  
78 sclera/cornea. Values in both ranges were assumed to be uniformly distributed.

79 Next, the effect of boundary delineation on estimated TM stiffness was tested using three  
80 different TM/CB delineations, where the boundary between the two tissue structures was most  
81 ambiguous and indistinguishable as observed in OCT images (Figure 2). Three different  
82 plausible CB delineations were established (Figure S2) and the analysis was repeated for each  
83 delineation.

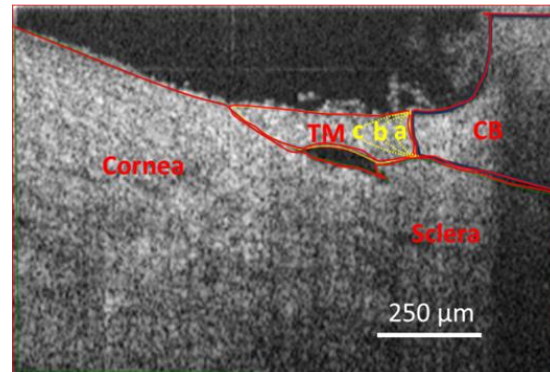

84

85 **Figure S2: Different TM/CB boundary delineations. Three possible TM/CB boundaries (a - c) are indicated by yellow dashed**  
86 **lines overlain on an OCT image. Sample: inferior nasal quadrant of Eye 77R.**

### 87 **Corrected loading pressure**

88 Finally, we realized that the pressure within the SC lumen is not necessarily the same as the  
89 reservoir pressure because of flow resistance in the system. For FE modeling, we must apply a  
90 pressure load that is consistent with the real situation in order to accurately simulate tissue  
91 deformation. The following shows how we estimated the relevant flow resistances and thus  
92 luminal SC pressures, using quadrant 77R-IN as an example.

### 93 Resistance Calculation in the OCT-based Inflation Test System:

- 94 (1) *Resistance of tubing:* There were 6 sections of tubing with known inner diameters (ID)  
95 and lengths (Figure S3) in the system. We assumed the tubing to be cylindrical and thus  
96 used Poiseuille flow (Equation S2) to calculate the hydrodynamic flow resistance to flow



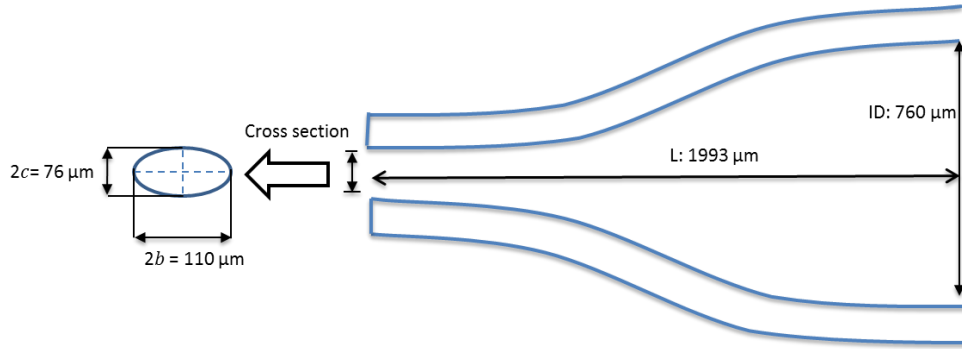

111

112

**Figure S4: Schematic view of the cannula. b: semi-major axis of ellipse; c: semi-minor axis of ellipse**

113(3) *Resistance of SC:* We assume the SC lumen to be a cylinder with elliptic cross section. The SC

114 lumen resistance ( $R_{SC}$ ) can be calculated as follows:

115 
$$R_{SC} = \frac{4\mu L_{SC}(b_{SC}^2 + c_{SC}^2)}{\pi b_{SC}^3 c_{SC}^3} \quad (S4)$$

116 where  $b_{SC}$  and  $c_{SC}$  are the semi-major and –minor axes of the elliptic SC cross section

117 measured by ImageJ (Version 1.5, National Institutes of Health, Bethesda MD) from OCT

118 scans;  $\mu$  is the viscosity of saline; and  $L_{SC}$  is the length of SC.  $L_{SC}$  was approximated as 8 mm

119 since each quadrant is one fourth of the anterior eye, which made it about 9 mm, and one

120 millimeter was taken off for wastage from cutting and trimming, etc.

121 The distance from the tip of the cannula to the scan location was about 2 mm. Thus, the

122 pressure at the scan location ( $P_{scan}$ ) was equal to the pressure drop from scan location to the

123 free end of the SC, which had a length of three fourths of the total SC length for this specific

124 quadrant:

125 
$$P_{scan} = \frac{3}{4} R_{SC} \times Q \quad (S5)$$

126 where  $Q$  is the flow rate along the SC (see equation S6). We assumed the pressure on the free

127 end of SC (Figure S5) was zero referenced to the bath pressure.

128

$$Q = \frac{P_{reservoir}}{R_{tubing} + R_{cannula} + R_{SC}} \quad (S6)$$

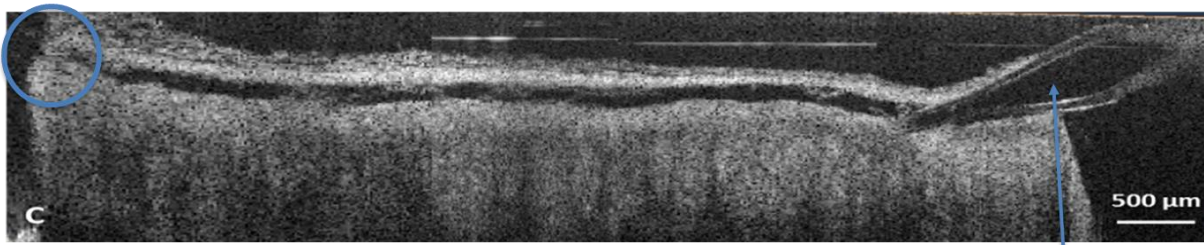

cannula

129

130 **Figure S5:** Representative cross-sectional OCT image containing the entire SC lumen. Cannula was inserted into the right side  
 131 of the SC. The region inside the blue circle shows apparent SC collapse, which was occasionally seen in some samples.

## 132 Results

### 133 Mesh refinement study

134 The predicted SC perimeter and area both converged to asymptotic values as the mesh  
 135 element size was reduced (Figure S6). Based on these results, an edge length of c. 7 μm was  
 136 judged suitable to balance accuracy and computational cost, which was approximately the  
 137 average element size we used for our models (5 – 10 μm).

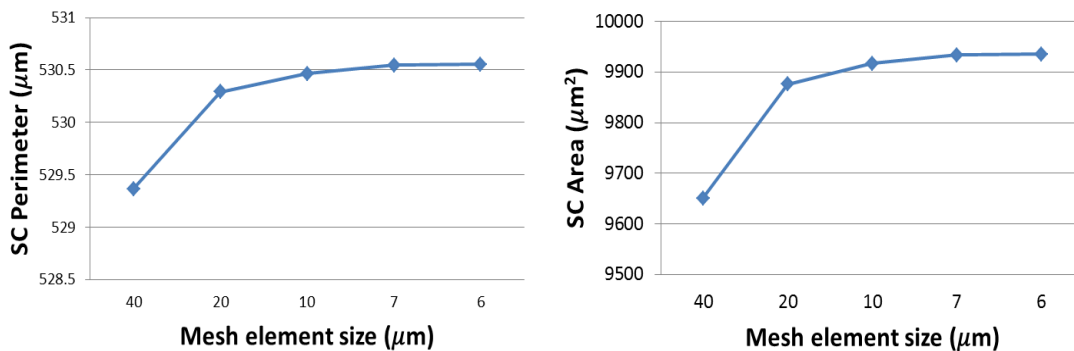

138

139 **Figure S6:** Mesh refinement test for FEM simulation. Y axes: SC lumen perimeter (μm) and area (μm<sup>2</sup>). X axis: average edge  
 140 length of hexahedral element (μm). Note inverted scale for x-axis. Sample: inferior nasal quadrant of Eye 77R



141 **3D model**

142 The best match between computed and experimentally measured SC area was achieved at a  
143 TM stiffness of 48 kPa (Figure S7), which can be compared to the value of 60 kPa obtained  
144 from the pseudo-2D model.

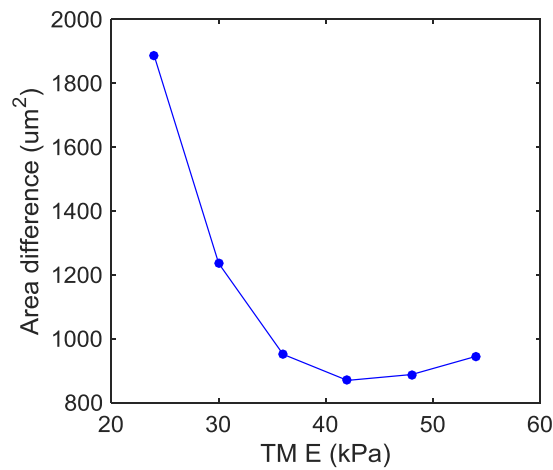

145

146 **Figure S7: Quantification of SC lumen area difference at a reservoir pressure of 30 mmHg in the 3D model. The X-axis is**

147 **Young's modulus of TM. Blue curve is the difference between observed and computed SC lumen area. The minimum**

148 **difference was observed at 48 kPa. Sample: superior temple quadrant of Eye 80R.**

149

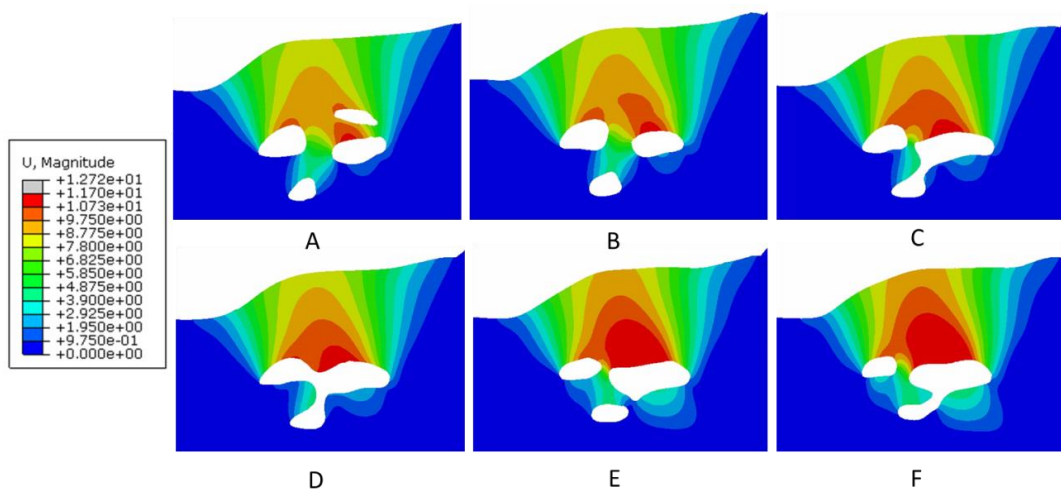

150

151 **Figure S8: Distribution of the total displacement of the 3D model at 6 different locations (A-F) along the SC lumen. Reservoir**

152 **pressure = 30 mmHg. Unit of color bar is μm. Sample: superior temple quadrant of Eye 80R.**

153 In addition, our 3D model predicted that, in general, the largest TM displacement occurred in the  
154 area around the inner wall of SC and center of the TM (Figure S8). Interestingly, relatively large  
155 deformations also appeared in the TLS region which divided the canal into compartments at the  
156 entrance of CC (Figure S7, A-C, E-F).

157 When comparing deformation patterns between the pseudo-2D and 3D models at the same  
158 scanning location, the deformation of the outflow tissues looked very similar (Figure S9), except  
159 that there was more deformation experienced in the septa region in the 3D model. The slightly  
160 lower TM stiffness predicted by the 3D model (48 kPa vs. 60 kPa) might be partially explained  
161 by these TLS, since the deformation of those structures suggested that they are in tension and  
162 therefore resisted SC lumen distention.

163 The 3D model had several advantages over the pseudo-2D model. It provided a more realistic  
164 tissue geometry which included multiple OCT slices. However, it suffered from some limitations.  
165 For example, the exact boundaries of TLS were not entirely clear and the stiffness used for TLS  
166 was somewhat arbitrary. In view of the very significant time commitment needed to create such  
167 3D models, and the relatively small difference in predicted TM stiffness between the 3D and  
168 pseudo-2D models, we chose to simply use pseudo-2D models in this work.

169

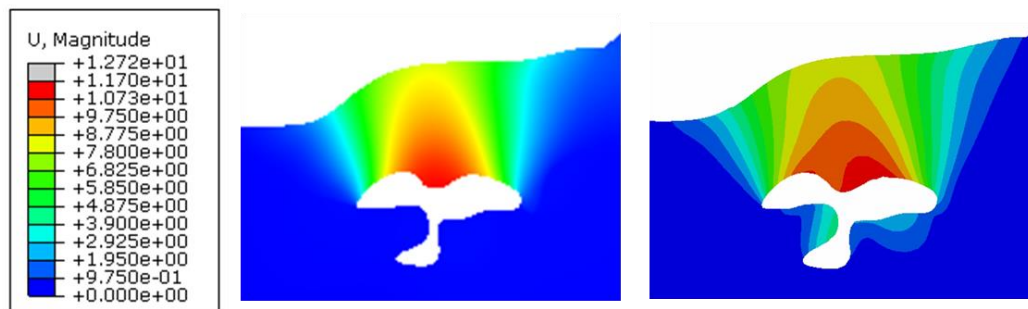

170

171 **Figure S9: Color map of the total displacement at the same location in 2D (left) and 3D (right) model. Sample: superior**

172

temple quadrant of Eye 80R.

173 **Sensitivity analysis**

174 We found that estimated TM stiffnesses were relatively insensitive to variations in input  
175 parameters (mean±SD: 122 ± 8.7 kPa for the quadrant considered). In fact, the estimated TM  
176 stiffness were between 114-120 kPa for more than 65% of the LHS combinations (Figure S10).  
177 Even though statistical analysis suggested that there was a significant partial correlation  
178 between two factors (stiffness of sclera/cornea and CB) and the estimated TM stiffness ( $p <$   
179 0.05), the squared partial rank correlation coefficients, which is a nonparametric measure of  
180 statistical dependence between the ranking of two variables, showed moderate correlations ( $<$   
181 0.5) between CB stiffness and estimated TM stiffness (Table S1). Overall, this analysis  
182 indicated that the estimated TM stiffness was insensitive to variation of CB stiffness, which we  
183 judged as the major source of material property uncertainty in our simulations.

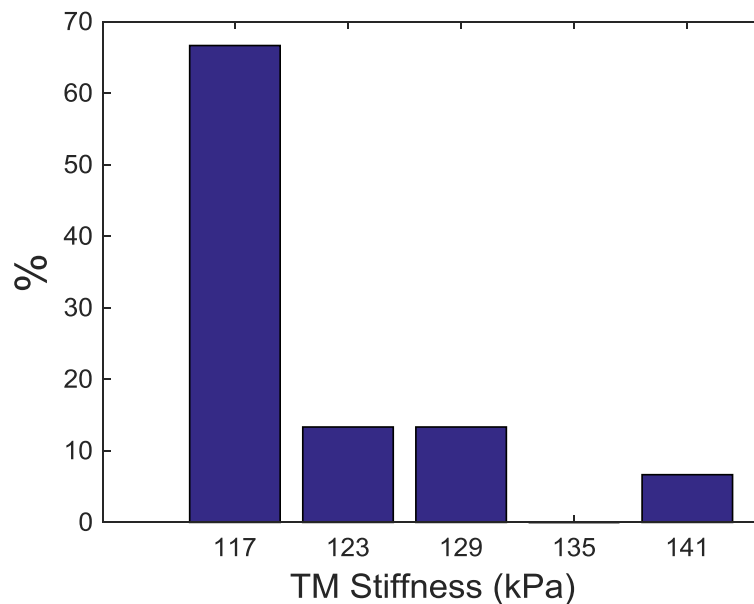

184

185

Figure S10: Histogram of estimated TM stiffnesses arising from LHS analysis.

186

187

188

189

**Table S1: Partial correlation between stiffness of two tissue components (sclera/cornea and CB) and TM\***

|          | <b>Sclera/Cornea</b> | <b>CB</b> |
|----------|----------------------|-----------|
| $prcc^2$ | 0.89                 | 0.45      |
| p-value  | < 0.05               | < 0.05    |

190 \* $prcc^2$ : squared partial rank correlation coefficient (or Spearman rank correlation coefficient), computed as  $prcc =$ 191  $1 - 6 \frac{\sum_{i=1}^N D_i^2}{N(N^2-1)}$ , where  $D_i$  is the difference between the ranks assigned to the corresponding pairs and N is the

192 sample size. Ties are assigned average ranks [5, 6].

193 For the sensitivity analysis on TM/CB boundary delineation, the estimated TM stiffness (120  
194 kPa) was identical for all three delineations.

195 In summary, the sensitivity analyses indicated that estimates of TM stiffness were relatively  
196 insensitive to both surrounding tissue stiffnesses and boundary delineation between the CB and  
197 TM.

### 198 **Corrected loading pressure**

199 For quadrant 77R-IN, the total tubing resistance ( $R_{tubing}$ ) and cannula resistance were  
200 estimated to be 0.26 and 1.53 mmHg/( $\mu$ L·s) (Table S2). The resistance of SC was 107.42  
201 mmHg/( $\mu$ L·s).

202

**Table S2: Resistance of tubing segments**

| <b>Tubing segment<br/>number</b> | <b>Resistance (mmHg/<math>\mu</math>L·s)</b> |
|----------------------------------|----------------------------------------------|
| 1                                | 0.0033                                       |
| 2                                | 0.0054                                       |
| 3                                | 0.0943                                       |
| 4                                | 0.0302                                       |
| 5                                | 0.0598                                       |
| 6                                | 0.0687                                       |

203  $P_{scan}$  values at different  $P_{reservoir}$  values are summarized in Table S3. The difference between  
204  $P_{scan}$  and  $P_{reservoir}$  is greater when  $P_{reservoir}$  is higher.

205 **Table S3: Flow rate and pressure in the experimental system\***

|            | $P_{reservoir} = 5 \text{ mmHg}$<br>(undeformed) | $P_{reservoir} = 20 \text{ mmHg}$<br>(deformed) |
|------------|--------------------------------------------------|-------------------------------------------------|
| $Q$        | 0.05                                             | 0.18                                            |
| $P_{scan}$ | 3.69                                             | 14.75                                           |

206 \*Q: flow rate, unit:  $\mu\text{L/s}$ ; P: pressure, unit: mmHg

207 **2. References**

208 1. Mckay, M.D., R.J. Beckman, and W.J. Conover, *A Comparison of Three Methods for Selecting*  
209 *Values of Input Variables in the Analysis of Output from a Computer Code*. Technometrics, 1979.  
210 **21**(2): p. 239-245.

211 2. Blower, S.M. and H. Dowlatabadi, *Sensitivity and Uncertainty Analysis of Complex-Models of*  
212 *Disease Transmission - an Hiv Model, as an Example*. International Statistical Review, 1994.  
213 **62**(2): p. 229-243.

214 3. McKee, C.T., et al., *Indentation versus tensile measurements of Young's modulus for soft*  
215 *biological tissues*. Tissue Eng Part B Rev, 2011. **17**(3): p. 155-64.

216 4. Tehrani, S., *Gender difference in the pathophysiology and treatment of glaucoma*. Curr Eye Res,  
217 2015. **40**(2): p. 191-200.

218 5. Conover, W.J., *Practical Nonparametric Statistics*. Third ed. 1999.

219 6. al., S.T.P.e., *OMNITAB 80: An Interpretive System for Statistical and Numerical Data Analysis*.  
220 1986: NBS Special Publication 701.

221
